# Supplementary material
Source: PubMed Central journal article supplement (PMC10351011)

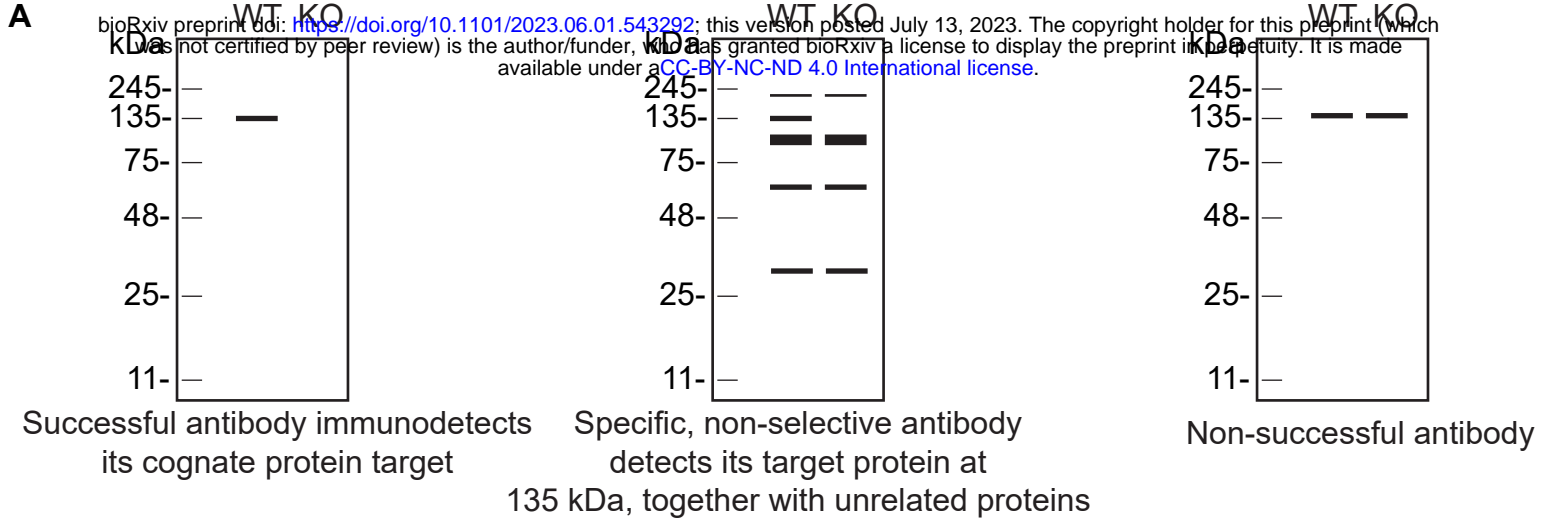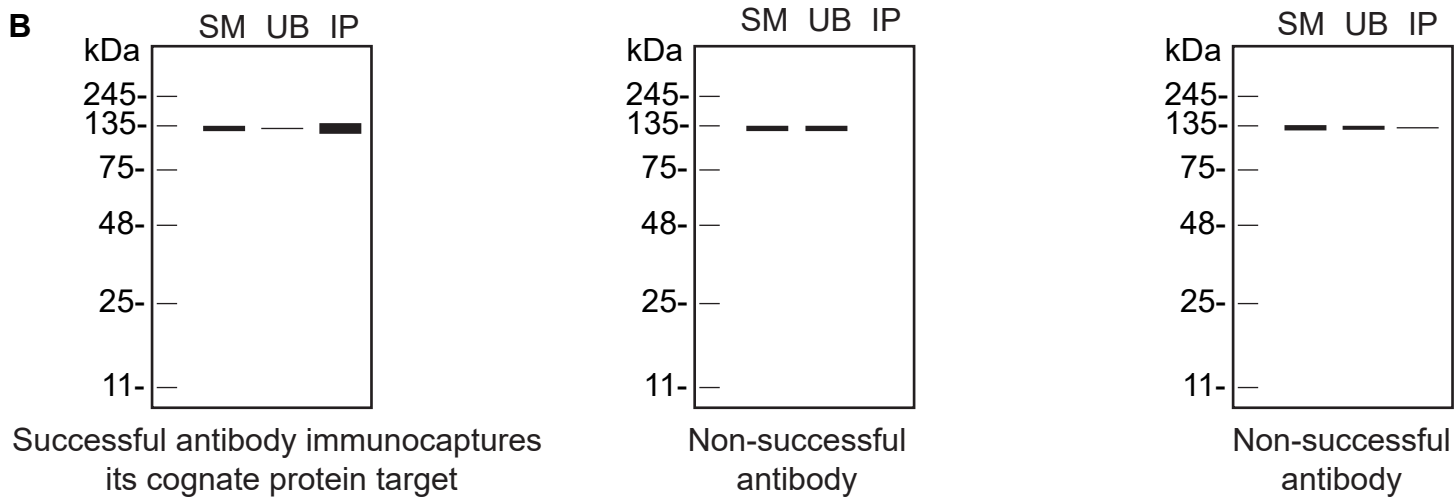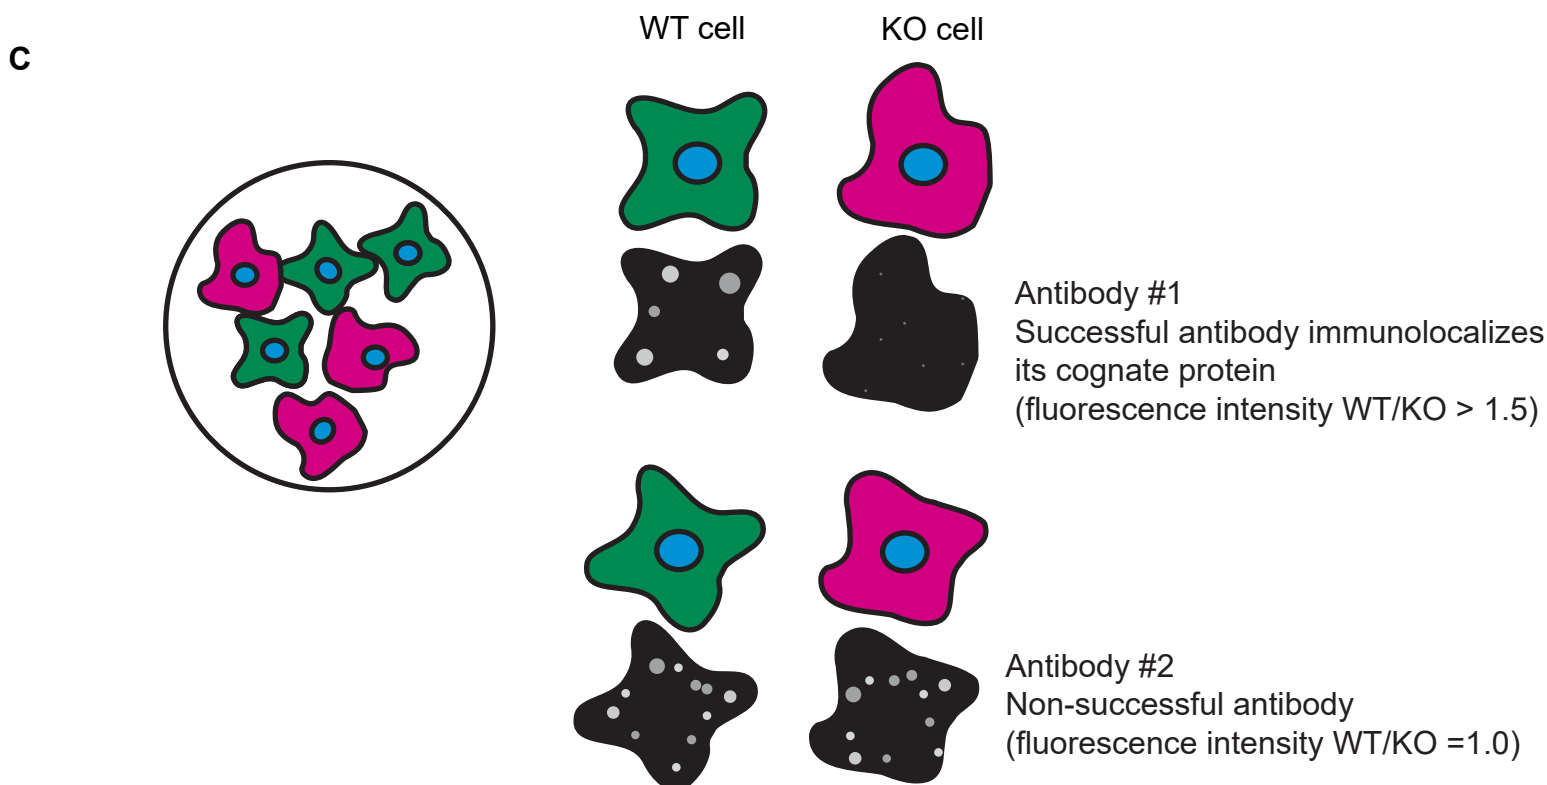

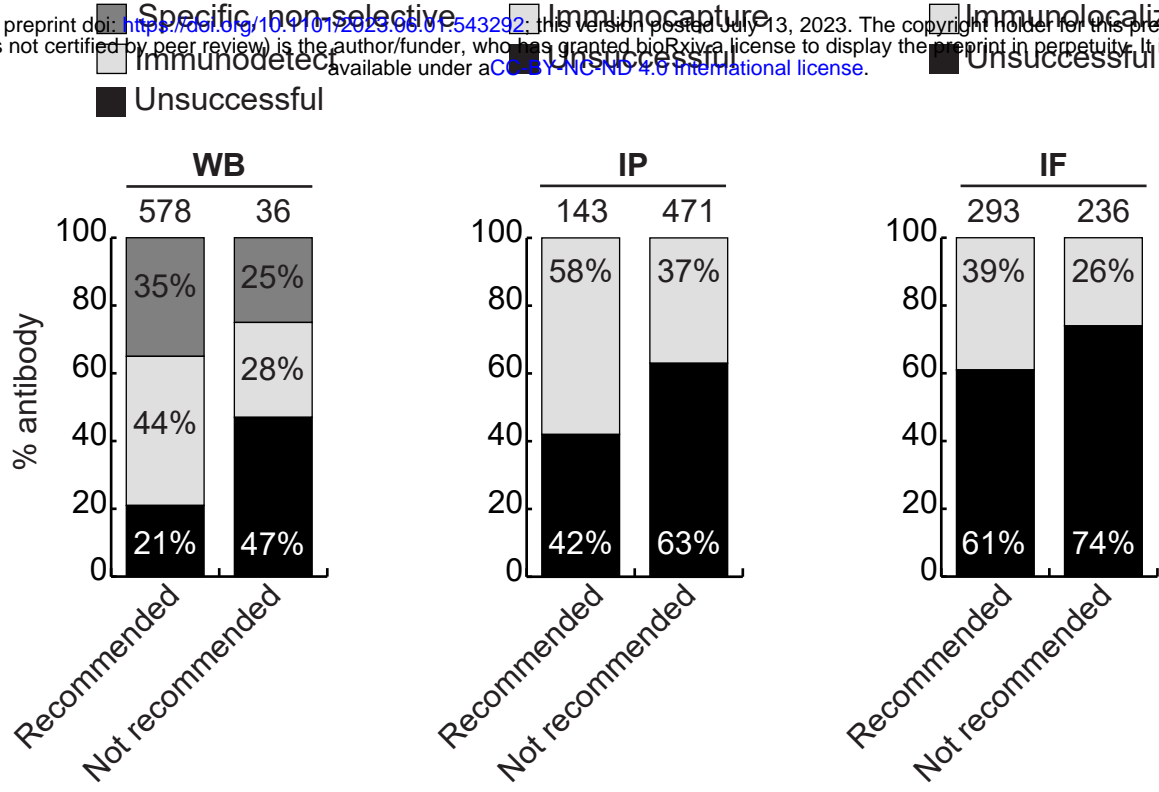

**A**

application #1

|      |      |      |
|------|------|------|
|      | fail | pass |
| fail | a    | b    |
| pass | c    | d    |

application #2

$$\chi^2 = \frac{(b-c)^2}{b+c}$$

**B**

|          |          |          |
|----------|----------|----------|
|          | IP: fail | IP: pass |
| WB: fail | 190      | 101      |
| WB: pass | 126      | 112      |

$\chi^2=1.3$   
 $p>0.1$

**C**

|          |          |          |
|----------|----------|----------|
|          | IP: fail | IP: pass |
| IF: fail | 255      | 98       |
| IF: pass | 61       | 115      |

$\chi^2=8.6$   
 $p<0.005$

**D**

|          |          |          |
|----------|----------|----------|
|          | WB: fail | WB: pass |
| IF: fail | 232      | 121      |
| IF: pass | 59       | 117      |

$\chi^2=21.4$   
 $p<0.0005$

WB: pass  
IP: fail

WB: fail  
IP: pass

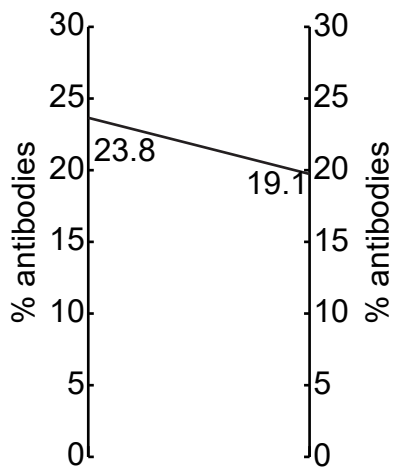

IF: pass  
IP: fail

IF: fail  
IP: pass

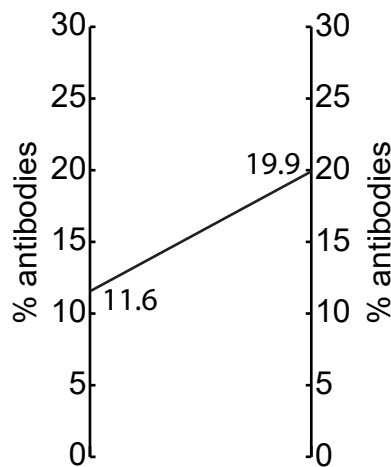

IF: pass  
WB: fail

IF: fail  
WB: pass

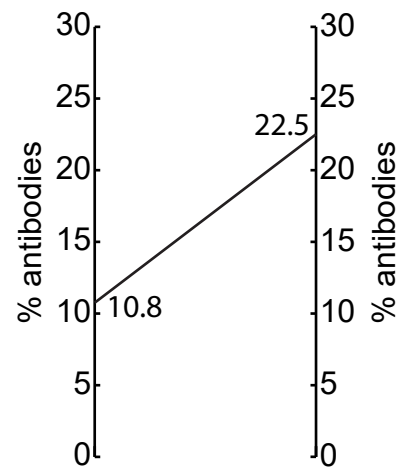

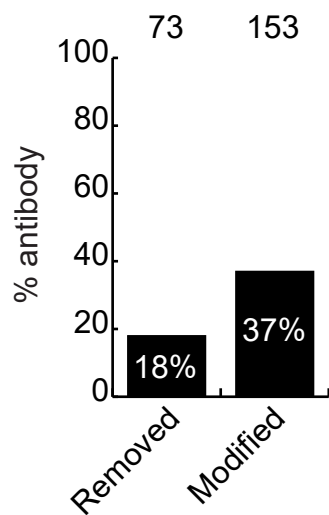

Supplement: NIHPP2023.06.01.543292V3-supplement-1.pdf [file NIHPP2023.06.01.543292V3-supplement-1.pdf]
